# Supplementary material for: Inhibition of the mitochondrial protein Opa1 curtails breast cancer growth
Source: PubMed Central journal article supplement (PMC8917763; doi:10.1186/s13046-022-02304-6), 2022-03-12
Supplement: 13046_2022_2304_MOESM1_ESM.pdf [file 13046_2022_2304_MOESM1_ESM.pdf]

**Inhibition of the mitochondrial protein Opa1 curtails breast cancer growth.**

Margherita Zamberlan, Amandine Boeckx et al.

**Supplementary material**

## Supplementary Methods

### KEY RESOURCES TABLE

| REAGENT or RESOURCE                                  | SOURCE                       | IDENTIFIER |
|------------------------------------------------------|------------------------------|------------|
| <b>Antibodies</b>                                    |                              |            |
| Rabbit anti-cyclinD2                                 | Cell Signalling              | 3741       |
| Mouse anti-Opa1                                      | BD-Biosciences               | 612607     |
| rabbit anti-GRP75                                    | Santa Cruz<br>Biotechnology  | sc-13967   |
| Mouse anti-Tom20                                     | Santa Cruz<br>Biotechnology  |            |
| Mouse anti-cyclinD3                                  | Cell signaling               | 2936       |
| Rabbit anti-Tom20                                    | Invitrogen                   |            |
| Rat anti mouse CD31                                  | BD Pharmingen                | 550274     |
| Anti mitofusin 1                                     | NeuroMabs                    | 75162      |
| Anti mitofusin 2                                     | ABM                          | Y401293    |
| Rabbit anti-ERK1/2-phospho, p44/42 MAPK Phospho      | Cell Signaling<br>Technology | 9101       |
| Rabbit anti-ERK1/2, p44/42 MAPK                      | Cell Signaling<br>Technology | 4695       |
| Rabbit anti-AKT pan (11EZ)                           | Cell Signaling<br>Technology | 4685       |
| Rabbit anti-Phospho-Akt (Ser473) Antibody            | Cell Signaling<br>Technology | 9271       |
| Alexa Fluor 488 goat anti mouse IgG                  | Life Technologies            | A11029     |
| Alexa Fluor 488 goat anti rabbit IgG                 | Life Technologies            | A11070     |
| Alexa Fluor 488 Chicken anti-Rat IgG                 | Life Technologies            | A21470     |
| Alexa Fluor 594 Donkey anti-Rabbit IgG               | Thermo fisher                | A10042     |
| Alexa Fluor 568 Goat anti-Rat IgG                    | Thermo fisher                | A-11077    |
| Alexa Fluor 568 Goat anti-Mouse IgG                  | Thermo fisher                | A-11019    |
| <b>Chemicals, Peptides, and Recombinant Proteins</b> |                              |            |
| BAPTA, AM                                            | Thermo Fisher<br>Scientific  | B6769      |
| Fura-2, AM                                           | Life Technologies            | F1221      |
| Rotenone                                             | Sigma-Aldrich                | R8875-1G   |
| FCCP                                                 | Sigma-Aldrich                | C2920      |
| Antimycin A                                          | Sigma-Aldrich                | A8674      |
| Oligomycin                                           | Sigma-Aldrich                | O4876      |
| TMRM                                                 | Invitrogen                   | T668       |

|                                                      |                          |                |
|------------------------------------------------------|--------------------------|----------------|
| MYLS22                                               | Enamine                  | EN300-333633   |
| Thapsigargin                                         | Sigma-Aldrich            | T903           |
| Trypan Blue Solution, 0.4%                           | Thermo Scientific Fisher | 15250061       |
| Matrigel matrix 3D                                   | VWR                      | 7341100        |
| Dharmafect 4                                         | Dharmacon                | T-2004-03      |
| <b>Critical Commercial Assays</b>                    |                          |                |
| Takyon ROX SYBR MasterMix blue dTTP                  | Eurogentec               | UF-RS MT-B0701 |
| Poly5A Tailing and reverse transcription of miRNA    | Biolabs                  |                |
| iScript cDNA Synthesis Kit                           | Biorad                   | 1708890        |
| E. coli Poly(A) Polymerase                           | Biolabs                  | M0276S         |
| Deoxynucleotide (dNTP) Solution Mix                  | Biolabs                  | N0447L         |
| M-MuLV Reverse Transcriptase                         | Biolabs                  | M0253S         |
| Breast Cancer Focus microRNA PCR Panel, 96-well      | Qiagen                   |                |
| ATPlite                                              | Perkin Elmer             | 6016943        |
| BrdU Chemiluminescence Kit                           | Roche                    | 11647229001    |
| RNeasy Mini Kit                                      | Qiagen                   | 74104          |
| Experion RNA StdSens Analysis kit                    | Bio-Rad                  | 7007103        |
| Pierce protein BCA assay                             | Thermo Fisher            | 23225          |
| Annexin V-FITC Apoptosis Detection Kit               | eBioscience              | BMS500FI/300   |
| <b>Experimental Models: Cell Lines</b>               |                          |                |
| T47D                                                 | Dr. Gilles, U. of Liège  |                |
| MDA MB231                                            | ATCC                     | ATCC-HTB26     |
| MCF7                                                 | Dr. Gilles, U. of Liège  |                |
| HS598T                                               | Dr. Gilles, U. of Liège  |                |
| <b>Experimental Models: Organisms/Strains</b>        |                          |                |
| NOD SCID mice                                        | U of Liège int. breeding | N/A            |
| <b>Oligonucleotides</b>                              |                          |                |
| <i>siRNA</i>                                         |                          |                |
| <i>OPA1 siRNA 1</i>                                  | Invitrogen               | 144409         |
| <i>OPA1 siRNA 2</i>                                  | Invitrogen               | 36409          |
| <i>Unrel</i>                                         | Ambion                   | AM4635         |
| <i>MFN1 siRNA 1</i> 5'-GGC GAU UAC UGC AAU CUU U-3', | DeBrito&Scorrano, 2008   | N/A            |
| <i>MFN1 siRNA2</i> 5'-CCA GAU GAA CCU UUU AAC A-3'   | DeBrito&Scorrano, 2008   | N/A            |

|                                                                      |                           |     |
|----------------------------------------------------------------------|---------------------------|-----|
| MFN2 siRNA1 5'-GGA GAG GGC CUU CAA<br>GCG C-3'                       | DeBrito&Scorrano,<br>2008 | N/A |
| MFN2 siRNA2 5'-GAG ACA CAU GGC UGA<br>GGU G-3'                       | DeBrito&Scorrano,<br>2008 | N/A |
| <b>Primers</b>                                                       |                           |     |
| <i>Cyclin D1</i> oligonucleotide for<br>CAATGACCCCGCACGATTTC         | Eurogentec                |     |
| <i>Cyclin D1</i> oligonucleotide rev<br>CATGGAGGGCGGATTGGAA          | Eurogentec                |     |
| <i>Cyclin D2</i> oligonucleotide for<br>CTCGAGGGATGCCAGTTGGGCC       | Eurogentec                |     |
| <i>Cyclin D2</i> oligonucleotide rev<br>GCGGCCGCCAAAAGCGTGAATCATTGCC | Eurogentec                |     |
| <i>Cyclin D3</i> oligonucleotide for<br>TACCCGCCATCCATGATCG          | Eurogentec                |     |
| <i>Cyclin D3</i> oligonucleotide rev<br>AGGCAGTCCACTTCAGTGC          | Eurogentec                |     |
| <i>B2M</i> oligonucleotide for<br>GAGTATGCCTGCCGTGTG                 | Eurogentec                |     |
| <i>B2M</i> oligonucleotide rev<br>AATCCAAATGCGGCATCT                 | Eurogentec                |     |
| <i>PPIA</i> oligonucleotide for<br>CCAACACAAATGGTTCCCACT             | Eurogentec                |     |
| <i>PPIA</i> oligonucleotide rev<br>CCATGGCCTCCACAATATTCA             | Eurogentec                |     |
| <i>OPA1</i> oligonucleotide for<br>AGCCTCGCAGGAATTTTTGG              | Eurogentec                |     |
| <i>OPA1</i> oligonucleotide rev<br>AGCCGATCCTAGTATGAGATAGC           | Eurogentec                |     |
| <i>MFN1</i> oligonucleotide for<br>ATGACCTGGTGTAGTAGACAGT            | Eurogentec                |     |
| <i>MFN1</i> oligonucleotide rev<br>AGACATCAGCATCTAGGCAAAAC           | Eurogentec                |     |
| <i>MFN2</i> oligonucleotide for<br>CACATGGAGCGTTGTACCAAG             | Eurogentec                |     |
| <i>MFN2</i> oligonucleotide rev<br>TTGAGCACCTCCTTAGCAGAC             | Eurogentec                |     |
| <i>INTB8</i> oligonucleotide for CGT GAC TTT<br>CGT CTT GGA TTT GG   | Eurogentec                |     |
| <i>INTB8</i> oligonucleotide rev TCC TTT CGG<br>GGT GGA TGC TAA      | Eurogentec                |     |
| <i>COL4A</i> oligonucleotide for GGG ATG CTG<br>TTG AAA GGT GAA      | Eurogentec                |     |

|                                                          |                             |                                                            |
|----------------------------------------------------------|-----------------------------|------------------------------------------------------------|
| COL4A oligonucleotide rev GGT GGT CCG<br>GTA AAT CCT GG  | Eurogentec                  |                                                            |
| SNORD44 gcaaatgctgactgaacatgaa                           | Eurogentec                  |                                                            |
| SNORD48 ctctgagtgtgtcgctgatgc                            | Eurogentec                  |                                                            |
| <b>Software and Algorithms</b>                           |                             |                                                            |
| Prism                                                    | GraphPad                    |                                                            |
| Photoshop                                                | Adobe                       |                                                            |
| Image J V1.38                                            | NIH                         | <a href="http://imagej.nih.gov/ij/">imagej.nih.gov/ij/</a> |
| Geneglobe                                                | QiaGEN                      |                                                            |
| <b>Other</b>                                             |                             |                                                            |
| Gelatin from bovine skin                                 | Sigma aldrich               | G9391                                                      |
| DMEM                                                     | Gibco                       | 31885049                                                   |
| Penicillin-streptomycin (5000U/ml)                       | Invitrogen                  | 15070-063                                                  |
| cOmplete™, Mini EDTA-free Protease<br>Inhibitor Cocktail | Roche                       | 4693159001                                                 |
| PhosStop Phosphatase Inhibitor Cocktail<br>Tablets       | Roche                       | 04906845001                                                |
| Amersham Hybond 0.45um PVDF                              | Thermo Fisher<br>Scientific | 15407374                                                   |
| ExpressPlus PAGE Gel, 10x8, 8% 12 wells                  | GenScript                   | M00812                                                     |
| ExpressPlus PAGE Gel, 10x8, 4-12% 10<br>wells            | GenScript                   | M41210                                                     |
| Trypsin-EDTA (0.25%)                                     | Thermo Fisher               | 25200056                                                   |
| Bovine Serum Albumin                                     | Sigma Aldrich               | A8806                                                      |
| Ketamidol 100mg/mL (Ketamine)                            | Ecuphar                     | 3026770                                                    |
| Proxylaz 20mg/mL (Xylazine)                              | Prodivet<br>pharmaceuticals | Nc                                                         |

## Supplementary Figures

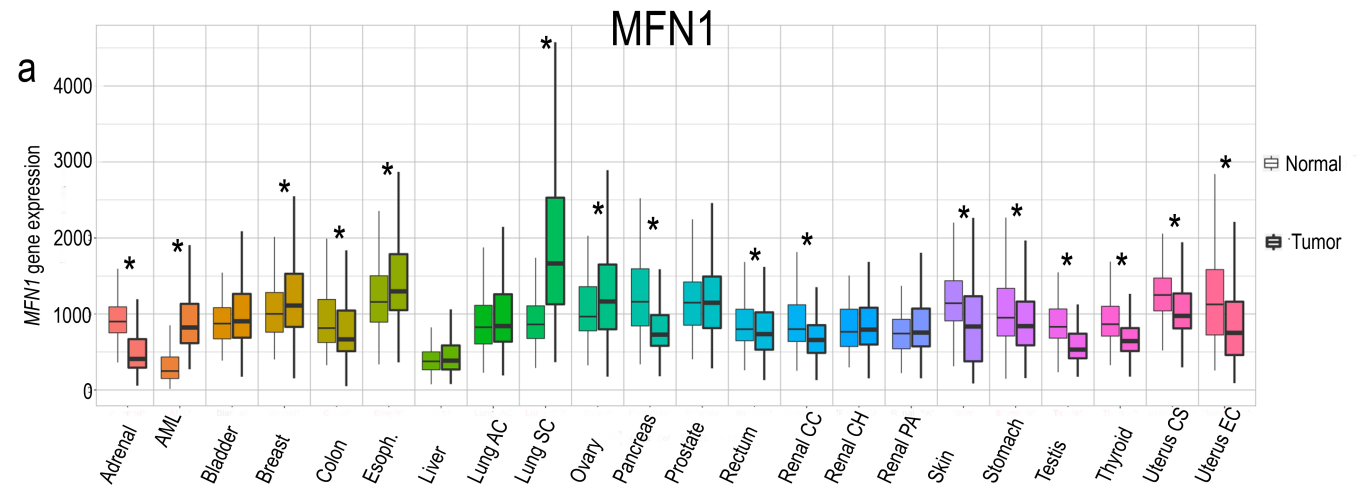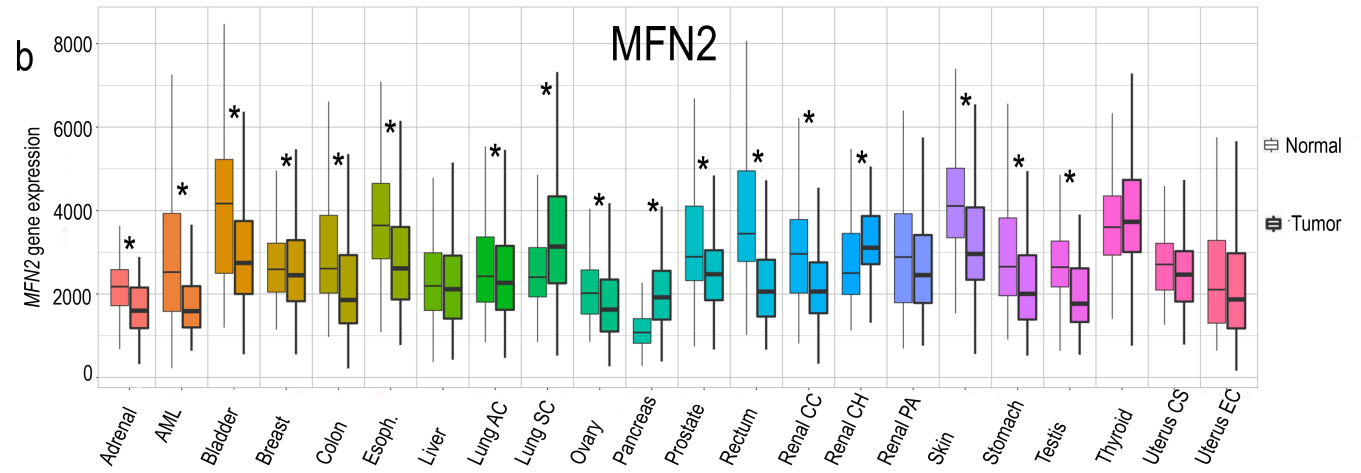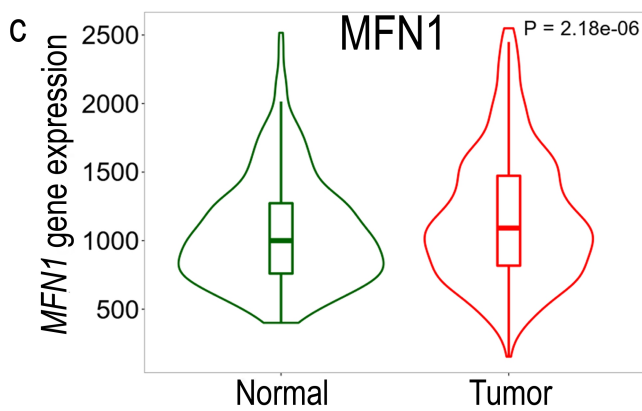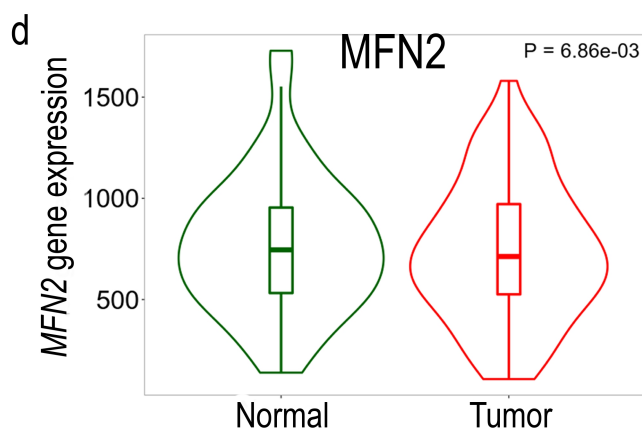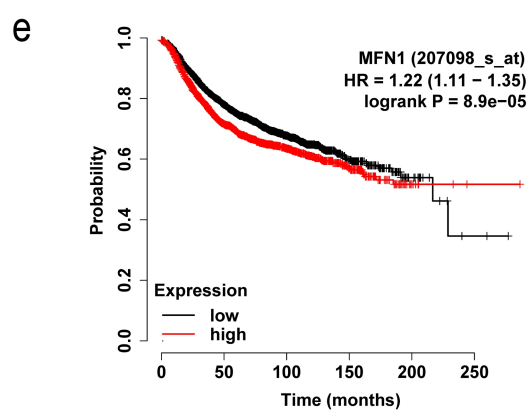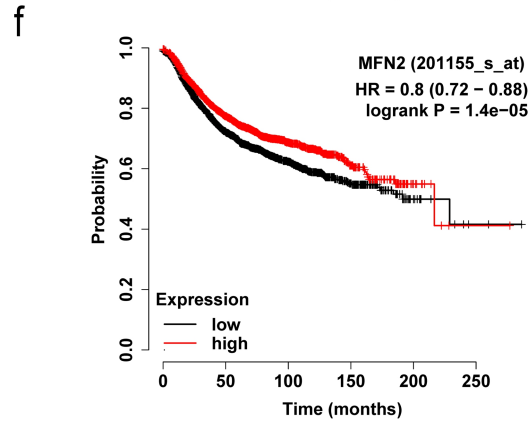

### **Supplementary Figure 1: MFNs expression is changed in breast cancer tissue**

- (a)** TNM plot of the MFN1 expression across all tissues in available normal and tumor RNA sequencing data (n=3691 normal, 29376 tumor samples, \*P<0.05). Data are resorted from <https://tnmplot.com>.
- (b)** TNM plot of the MFN2 expression across all tissues in available normal and tumor RNA sequencing data (n=3691 normal, 29376 tumor samples, \*P<0.05). Data are resorted from <https://tnmplot.com>.
- (c)** Violin plot of the MFN1 expression in breast invasive carcinoma from RNA sequencing data available. Data are resorted from <https://tnmplot.com>.
- (d)** Violin plot of the MFN2 expression in breast invasive carcinoma from RNA sequencing data available. Data are resorted from <https://tnmplot.com>.
- (e)** Kaplan-Meier curve for breast cancer patients with high or low MFN1 levels. Data are resorted from Kaplan-Meier Plotter (<http://kmplot.com>). (Affymetrix id: 207098\_s\_at; Status: all. Follow up threshold: all; split on median.
- (f)** Kaplan-Meier curve for breast cancer patients with high or low MFN2 levels. Data are resorted from Kaplan-Meier Plotter (<http://kmplot.com>). Affymetrix id: 216205\_s\_at; Status: all. Follow up threshold: all; split on median.



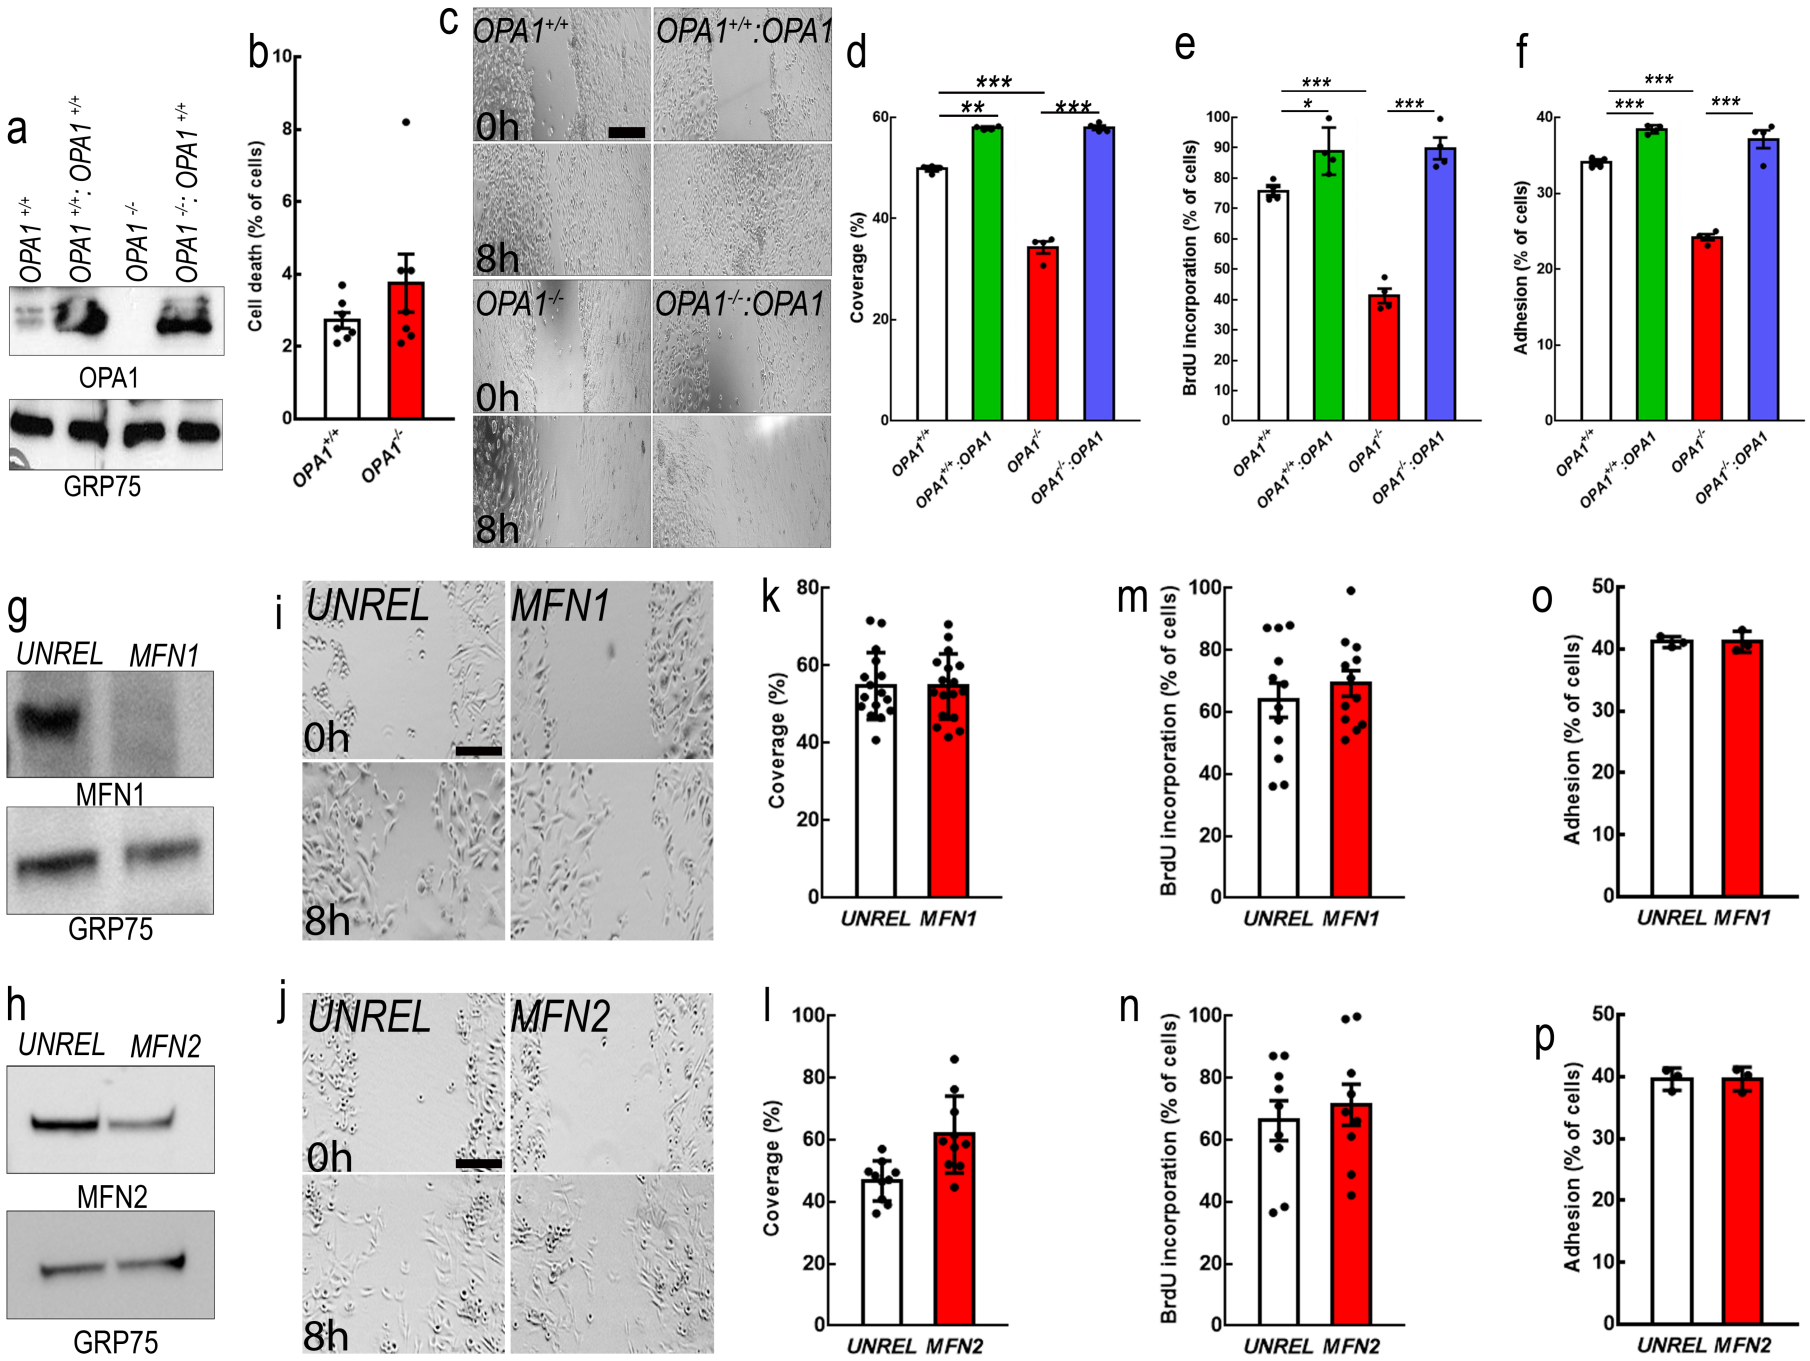

## **Supplementary Figure 2: MFNs are not required for breast cancer cells migration, proliferation and adhesion**

- (a)** Quantification of cell apoptosis of MDA-MB-231 with the indicated genotype determined by annexin V/propidium iodide label by flow cytometry. n=4 independent experiments.
- (b)** Equal amounts of protein from breast cancer cells MDA-MB-231 with the indicated genotype were separated by SDS-PAGE and immunoblotted with the indicated antibodies.
- (c)** Representative brightfield images acquired at the indicated time points of MDA-MB-231 with the indicated genotype and transfected as indicated in a scratch-wound assay. Scale bar: 250  $\mu$ m.
- (d)** Quantification of cell migration after 6h, experiments as in **(c)**. n=4 independent experiments. \*\*\*:  $p < 0.0001$ .
- (e)** Quantification of proliferation of MDA-MB-231 with the indicated genotype and transfected as indicated determined by BrdU incorporation. n=12 independent experiments. \*\*\*:  $p < 0.0001$ ; \*:  $p < 0.05$ .
- (f)** Quantification of cell adhesion on fibronectin for 1h of MDA-MB-231 with the indicated genotype and transfected as indicated. n= 4 independent experiments. \*\*\*:  $p < 0.0001$ .
- (g-h)** Equal amounts of protein from breast cancer cells MDA-MB-231 transfected for 72h with the indicated siRNA were separated by SDS-PAGE and immunoblotted with the indicated antibodies.
- (i-j)** Representative brightfield images acquired at the indicated time points of MDA MB-231 transfected with the indicated siRNA in a scratch-wound assay. Scale bar: 250  $\mu$ m.
- (k-l)** Quantification of cell migration after 6h, experiments as in **(i-j)**. n=16 (MFN1), n=9 (MFN2) independent experiments.

**(m-n)** Quantification of proliferation of MDA-MB-231 transfected with the indicated siRNA determined by BrdU incorporation. n=12 (MFN1), n=9 (MFN2) independent experiments.

**(o-p)** Quantification of cell adhesion on fibronectin for 1h of MDA-MB-231 cells transfected with the indicated siRNA for 72h. n= 4 independent experiments.

a

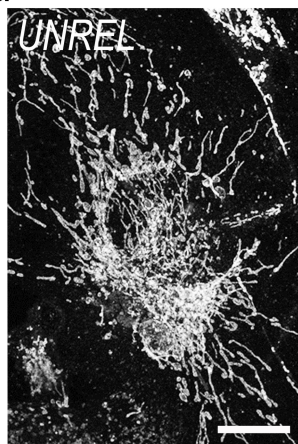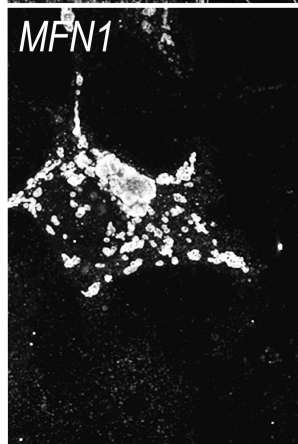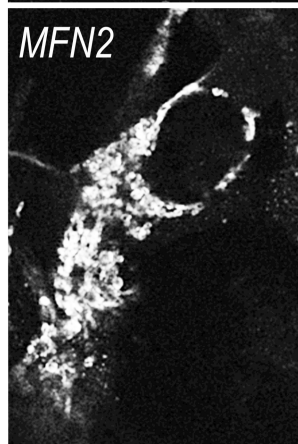

b

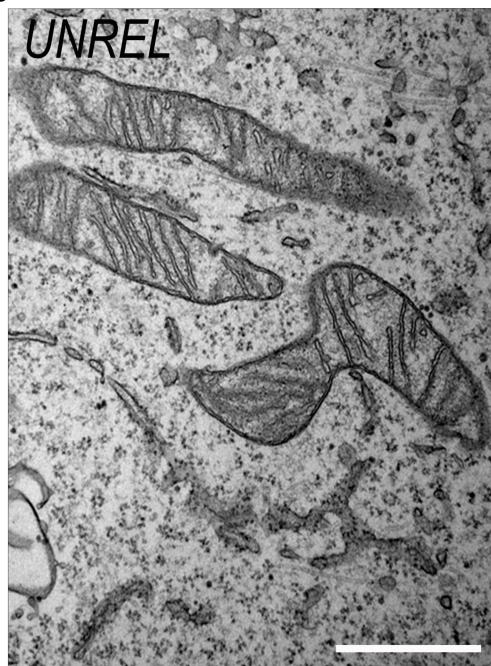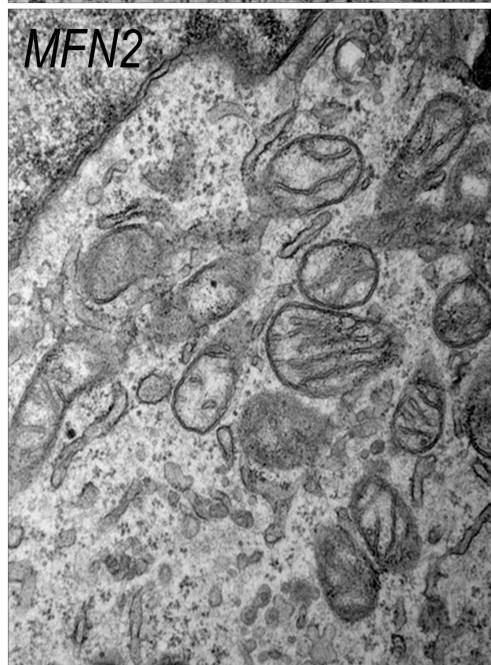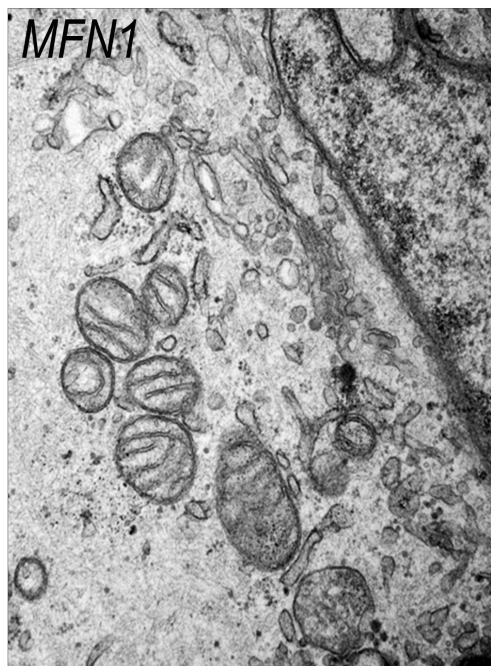

c

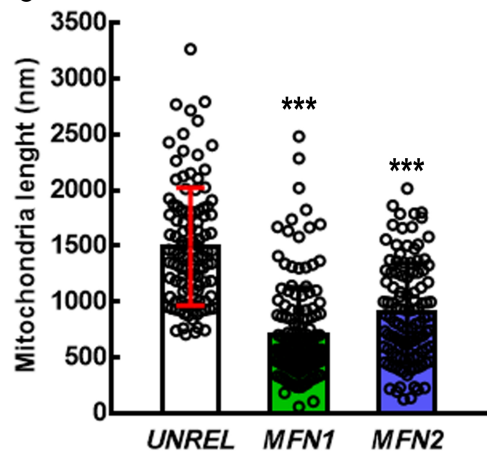

### **Supplementary Figure 3: MFNs ablation induce mitochondrial fragmentation**

- (a)** Representative confocal images of mitochondrial morphology in MDA-MB-231 transfected with the indicated siRNA for 72h and stained for TOM20. Scale bar: 30  $\mu\text{m}$ .
- (b)** Representative EM images of MDA-MB-231 transfected for 72h with the indicated siRNA. Scale bar: 500 nm.
- (c)** Quantification of mitochondrial length in experiments as in **(B)**. n=240 mitochondria/condition from 3 independent experiments. \*\*\*  $p < 0.001$ .

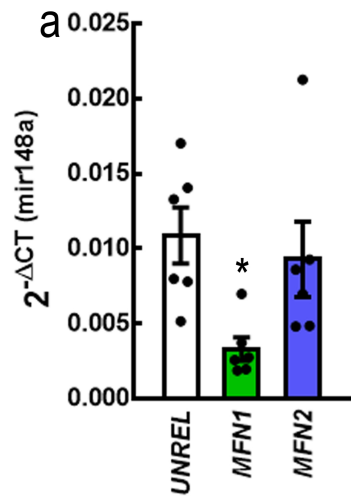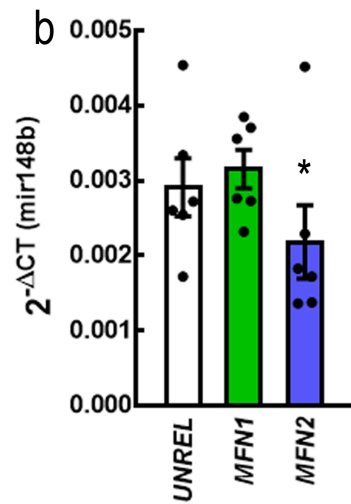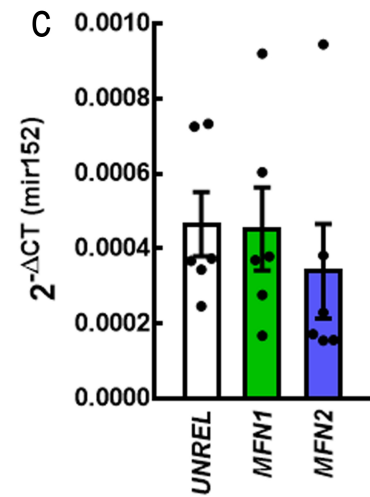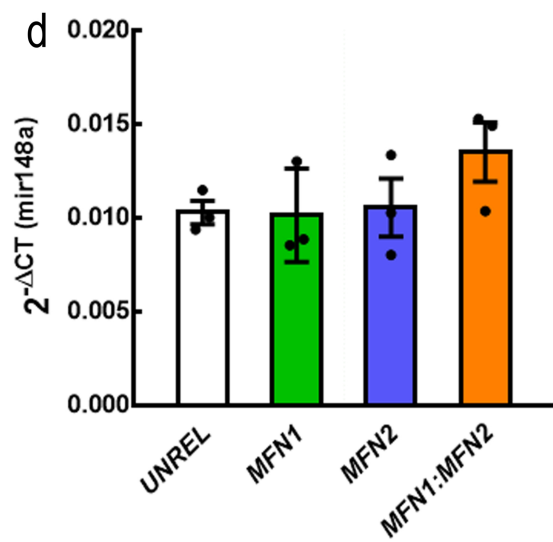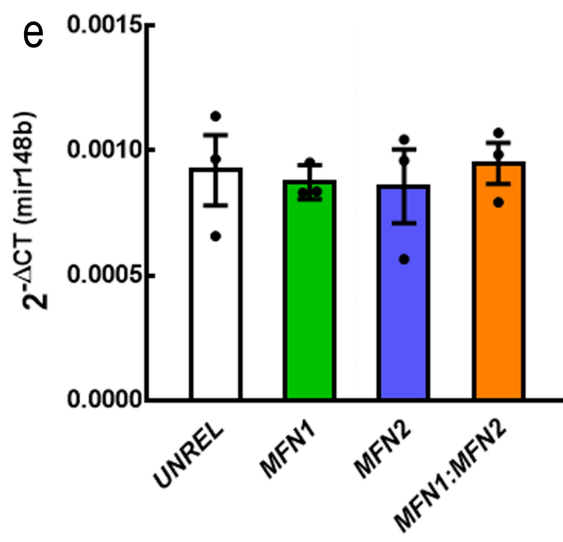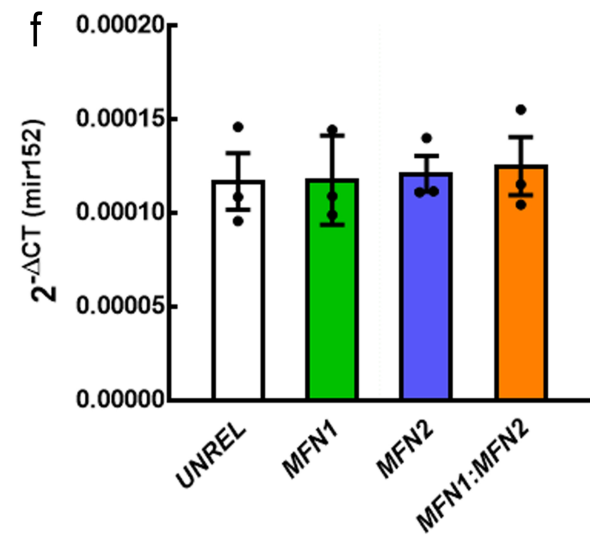

**Supplementary Figure 4: MFNs level does not affect miRNA 148a; 148b and 152 level.**

- (a)  $2^{-\Delta ct}$  of *mir148a* levels determined by qRT-PCR in MDA-MB-231 transfected as indicated for 72h. n=6 independent experiments.
- (b)  $2^{-\Delta ct}$  of *mir148b* levels determined by qRT-PCR in MDA-MB-231 transfected as indicated for 72h. n=6 independent experiments.
- (c)  $2^{-\Delta ct}$  of *mir152* levels determined by qRT-PCR in MDA-MB-231 transfected as indicated for 72h. n=6 independent experiments.
- (d)  $2^{-\Delta ct}$  of *mir148a* levels determined by qRT-PCR in MDA-MB-231 with the indicated genotype. n=3 independent experiments.
- (e)  $2^{-\Delta ct}$  of *mir148b* levels determined by qRT-PCR in MDA-MB-231 with the indicated genotype. n=3 independent experiments.
- (f)  $2^{-\Delta ct}$  of *mir152* levels determined by qRT-PCR in MDA-MB-231 with the indicated genotype. n=3 independent experiments.

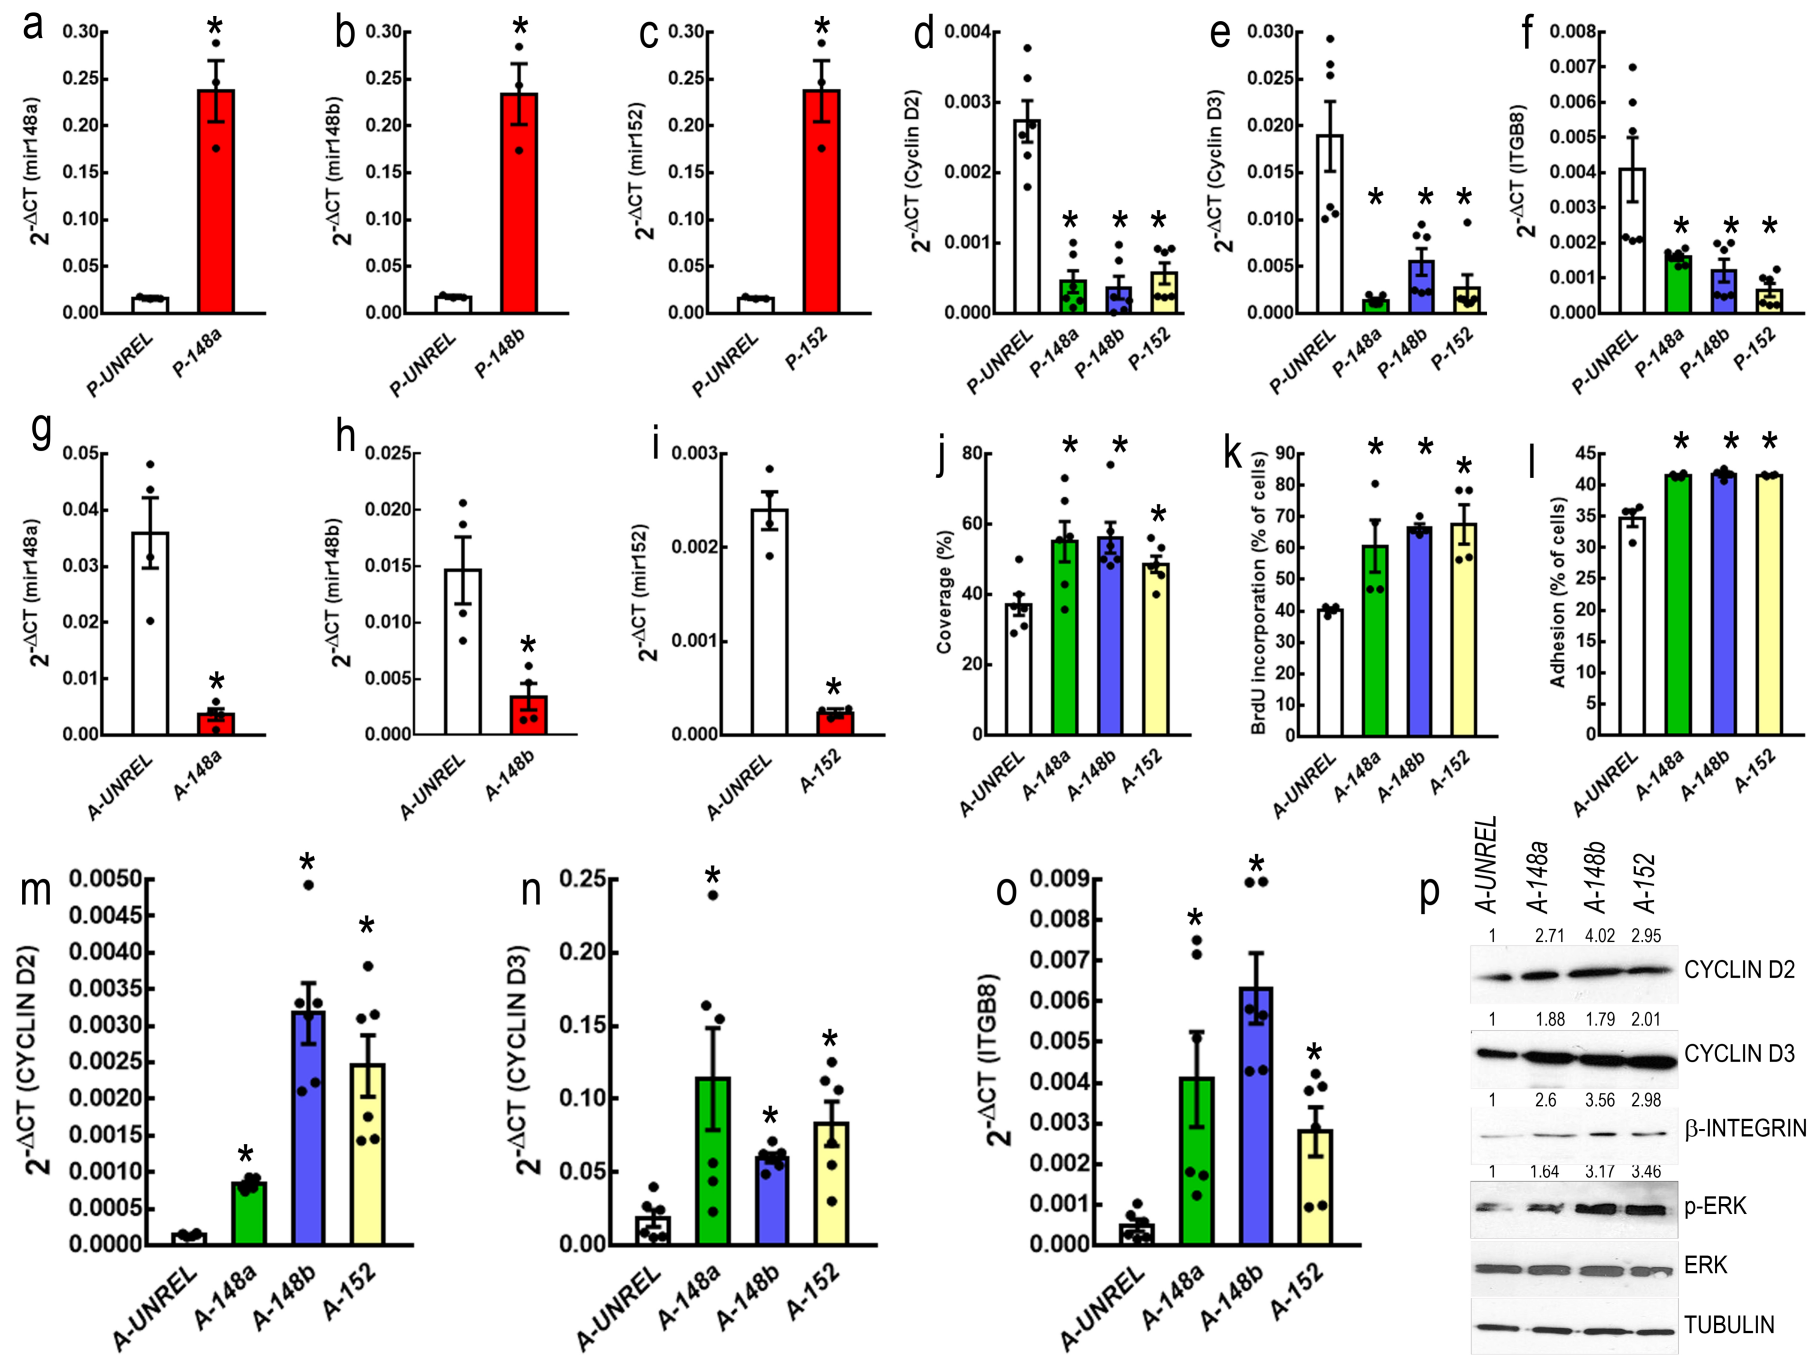



**Supplementary Figure 5: miRNA 148a, 148b and 152 level modulation regulates MDA-MB-231 migration, proliferation and adhesion**

- (a)  $2^{-\Delta ct}$  of *mir148a* levels determined by qRT-PCR in MDA-MB-231 transfected as indicated for 24h. n=3 independent experiments. \* p<0.05. P-= mimic miRNA.
- (b)  $2^{-\Delta ct}$  of *mir148b* levels determined by qRT-PCR in MDA-MB-231 transfected as indicated for 24h. n=3 independent experiments. \* p<0.05. P-= mimic miRNA.
- (c)  $2^{-\Delta ct}$  of *mir152* levels determined by qRT-PCR in MDA-MB-231 transfected as indicated for 24h. n=3 independent experiments. \* p<0.05. P-= mimic miRNA.
- (d)  $2^{-\Delta ct}$  of *Cyclin D2 mRNA* levels determined by qRT-PCR in MDA-MB-231 transfected for 24h with the indicated mimic miRNA. n=6 independent experiments. P-= mimic miRNA.
- (e)  $2^{-\Delta ct}$  of *Cyclin D3 mRNA* levels determined by qRT-PCR in MDA-MB-231 transfected for 24h with the indicated mimic miRNA. n=6 independent experiments. P-= mimic miRNA.
- (f)  $2^{-\Delta ct}$  of *ITGB8 mRNA* levels determined by qRT-PCR in MDA-MB-231 transfected for 24h with the indicated mimic miRNA. n=6 independent experiments. P-= mimic miRNA.
- (g)  $2^{-\Delta ct}$  of *mir148a* levels determined by qRT-PCR in MDA-MB-231 transfected as indicated for 24h. n=3 independent experiments. \* p<0.05.. A-: anti-miRNA.
- (h)  $2^{-\Delta ct}$  of *mir148b* levels determined by qRT-PCR in MDA-MB-231 transfected as indicated for 24h. n=3 independent experiments. \* p<0.05.. A-: anti-miRNA.
- (i)  $2^{-\Delta ct}$  of *mir152* levels determined by qRT-PCR in MDA-MB-231 transfected as indicated for 24h. n=3 independent experiments. \* p<0.05.. A-: anti-miRNA.
- (j) Quantification of cell migration of MDA-MB-231 transfected for 24h with the indicated anti-miRNA after 6h in a scratch wound assay. n=6 independent experiments. \*: p<0.05. A-: anti-miRNA.
- (k) Quantification of proliferation of MDA-MB-231 transfected for 24h as indicated determined by BrdU incorporation. n=6 independent experiments. \*: p<0.05. A-: anti-miRNA.
- (l) Quantification of cell adhesion on fibronectin of MDA-MB-231 transfected for 24h as indicated. n=4 independent experiments. \*: p<0.05. A-: anti-miRNA.

- (m)**  $2^{-\Delta ct}$  of *Cyclin D2 mRNA* levels determined by qRT-PCR in MDA-MB-231 transfected for 24h with the indicated anti-miRNA. n=6 independent experiments. A-: Anti-miRNA.
- (n)**  $2^{-\Delta ct}$  of *Cyclin D3 mRNA* levels determined by qRT-PCR in MDA-MB-231 transfected for 24h with the indicated anti-miRNA. n=6 independent experiments. A-: Anti-miRNA.
- (o)**  $2^{-\Delta ct} 2^{\Delta ct}$  of *ITGB8 mRNA* levels determined by qRT-PCR in MDA-MB-231 transfected for 24h with the indicated anti-miRNA. n=6 independent experiments. A-: Anti-miRNA.
- (p)** Equal amounts of protein from breast cancer cells MDA-MB-231 transfected for 24h with the indicated anti-miRNA were separated by SDS-PAGE and immunoblotted with the indicated antibodies. Numbers above each panel represent densitometry analysis. A-: Anti-miRNA.

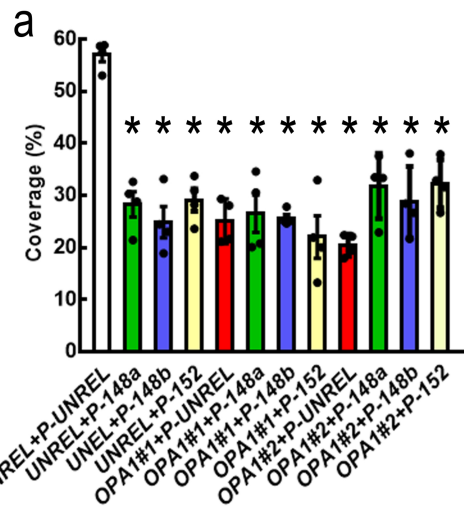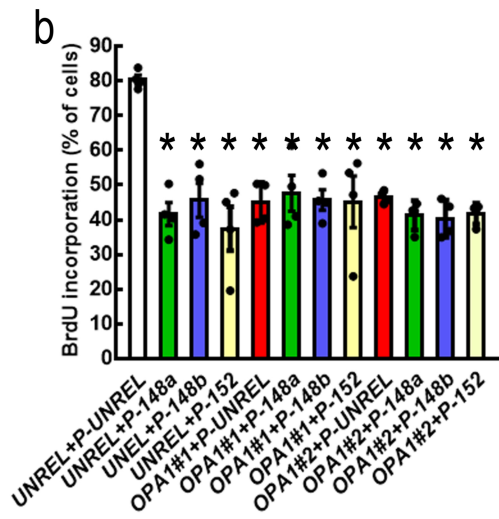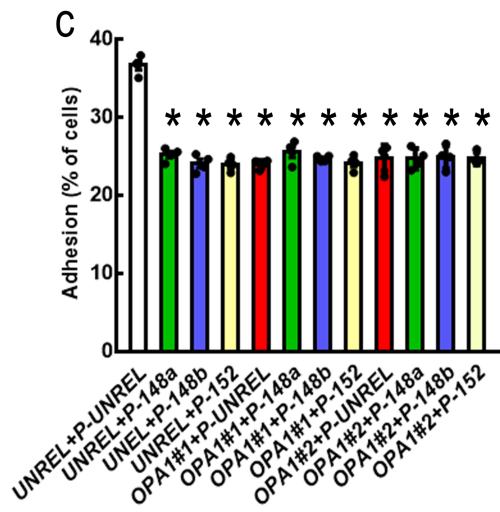

**Supplementary Figure 6: No additive effect of OPA1 ablation and miRNA 148a, 148b and 152 overexpression.**

- (a) Quantification of migration of MDA-MB-231 transfected with the indicated siRNA for 72h and with the indicated miRNA for 24h by scratch wound assay after 6h. n= 4 independent experiments. \*:  $p < 0.05$ . P-: miRNA mimic.
- (b) Quantification of proliferation of MDA-MB-231 transfected with the indicated siRNA for 72h and with the indicated miRNA for 24h determined by BrdU incorporation. n=4 independent experiments. \*:  $p < 0.05$ . P-: miRNA mimic.
- (c) Quantification of cell adhesion on fibronectin of MDA-MB-231 transfected with the indicated siRNA for 72h and with the indicated miRNA for 24h. n=4 independent experiments. \*:  $p < 0.05$ . P-: miRNA mimic.
